# Supplementary material
Source: PubMed Central journal article supplement (PMC3622337)
Supplement: supp_M036533_jlr.M036533-1.pdf [file supp_M036533_jlr.M036533-1.pdf]

**CYP2J2 Overexpression Increases EETs and Protects against  
Angiotensin II-Induced Abdominal Aortic Aneurysm in Mice**

Zhejun Cai, Gang Zhao, Jiangtao Yan, Wanjun Liu, Wenjing Feng, Ben Ma, Lei  
Yang, Jian-An Wang, Jian-an Wang, Ling Tu and Dao Wen Wang

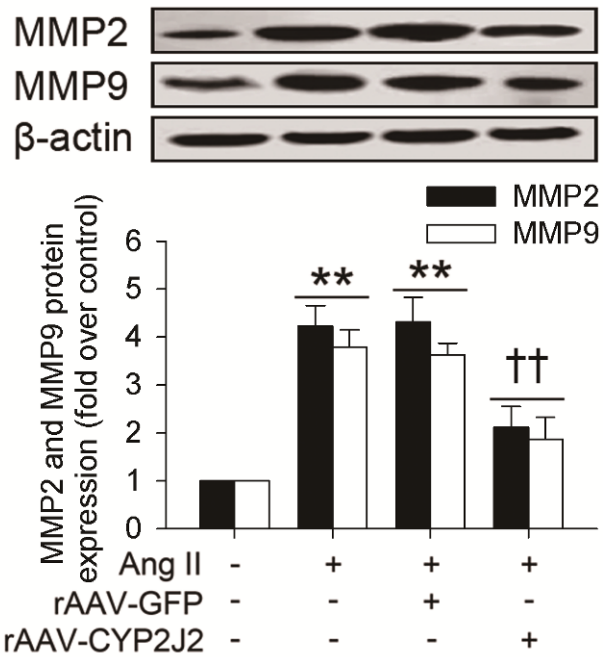

**Figure S1. rAAV-CYP2J2 delivery reduced aortic MMPs expression induced by Ang II infusion in ApoE<sup>-/-</sup> mice.** Western blot analysis showed that CYP2J2 overexpression reduced MMP2 and MMP9 expression in the aortic tissues of ApoE<sup>-/-</sup> mice 8 weeks after rAAV-CYP2J2 injection (n=8 for each group; \*\*  $P < 0.01$  vs. control; ††  $P < 0.01$  vs. Ang II + rAAV-GFP).

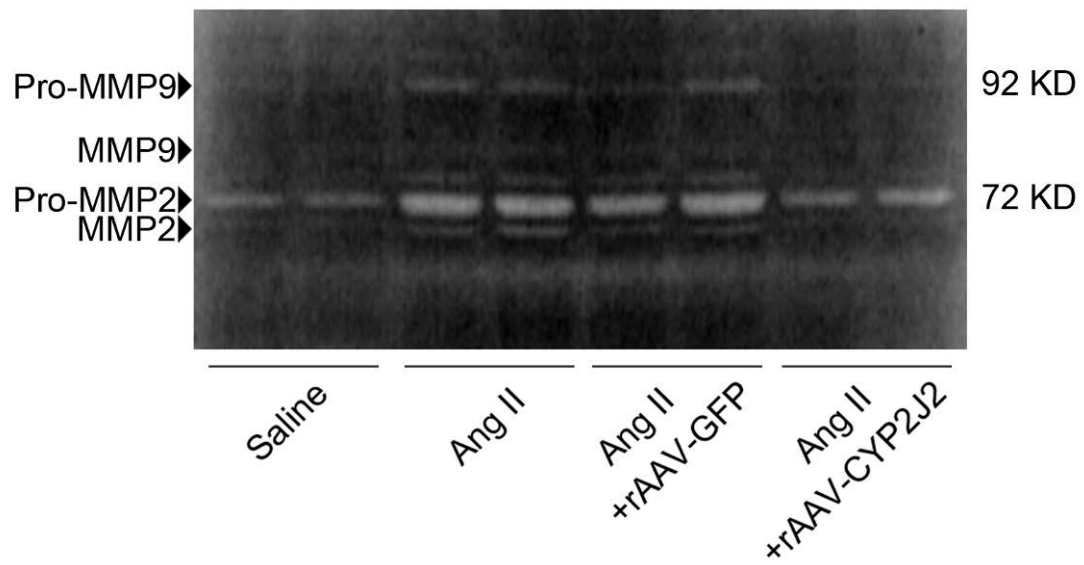

**Figure S2. CYP2J2 overexpression reduced aortic MMPs activities induced by Ang II infusion in ApoE<sup>-/-</sup> mice.** Gelatin zymographic analysis showed that CYP2J2 overexpression reduced MMP2 and MMP9 activities in the aortic tissues of ApoE<sup>-/-</sup> mice 8 weeks after rAAV-CYP2J2 injection.

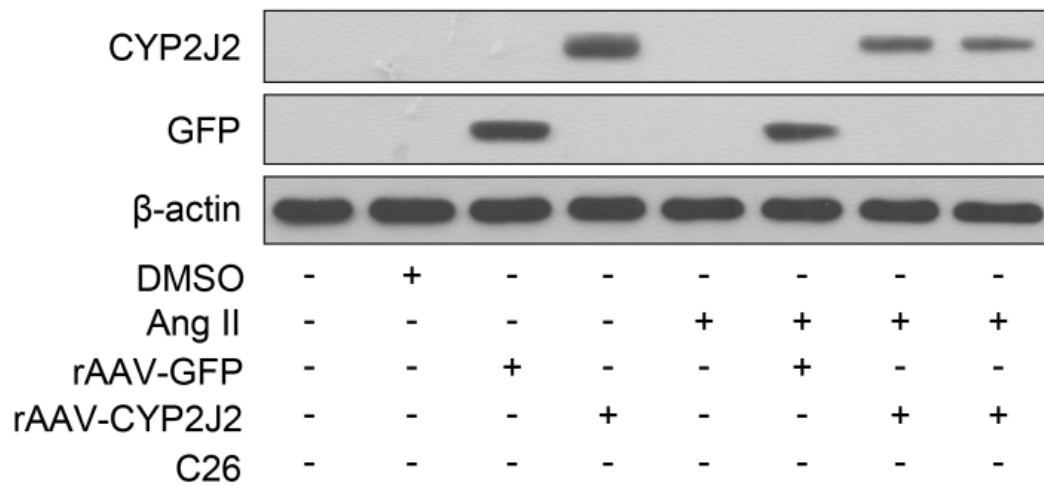

**Figure S3. rAAV-CYP2J2 transfection significantly induced CYP2J2 expression in VSMC.** Western blot analysis showed that rAAV-CYP2J2 and rAAV-GFP transfection significantly induced corresponding CYP2J2 and GFP expression in VSMC, respectively.

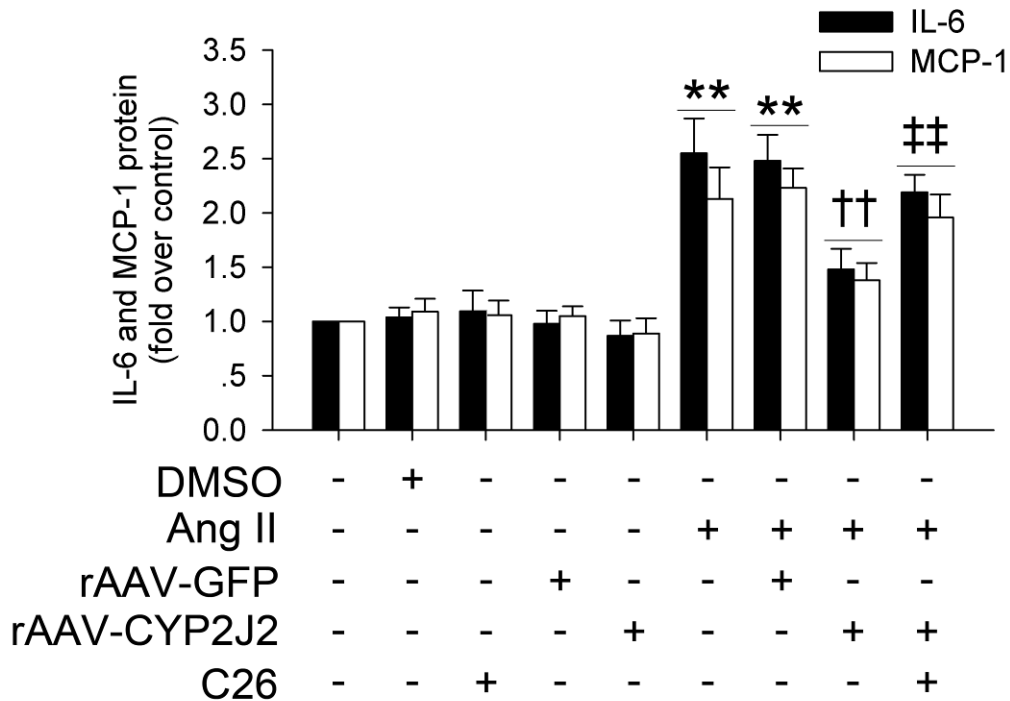

**Figure S4. rAAV-mediated CYP2J2 overexpression suppressed Ang II-induced inflammatory cytokines expression in VSMCs.** ELISA analysis showed that rAAV-CYP2J2 transfection significantly reduced inflammatory cytokines IL-6 and MCP-1 expression induced by Ang II (10  $\mu\text{mol/l}$ ) in VSMCs. However, the selective CYP2J2 inhibitor, C26 (10  $\mu\text{mol/l}$ ), markedly inhibited the effect of CYP2J2 overexpression (n=3 for each experiment; \*\*  $P < 0.01$  vs. control; ††  $P < 0.01$  vs. Ang II + rAAV-GFP; †††  $P < 0.01$  vs. Ang II + rAAV-CYP2J2).

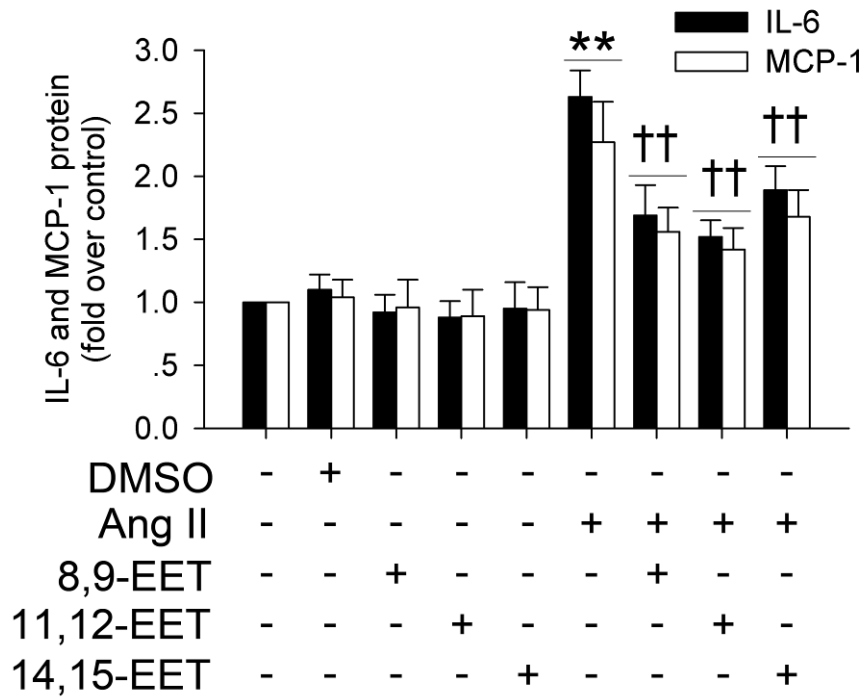

**Figure S5. EETs suppressed Ang II-induced inflammatory cytokines expression in VSMCs.** CYP2J2 metabolites, 10  $\mu\text{mol/l}$  of 8,9-, 11,12-, and 14,15-EETs could all suppressed Ang II (10  $\mu\text{mol/l}$ ) induced increase in IL-6 and MCP-1 expression in VSMCs assessed by ELISA, and 11,12-EET exhibited the most profound effect (n=3 for each experiment; \*\*  $P < 0.01$  vs. control; ††  $P < 0.01$  vs. Ang II).

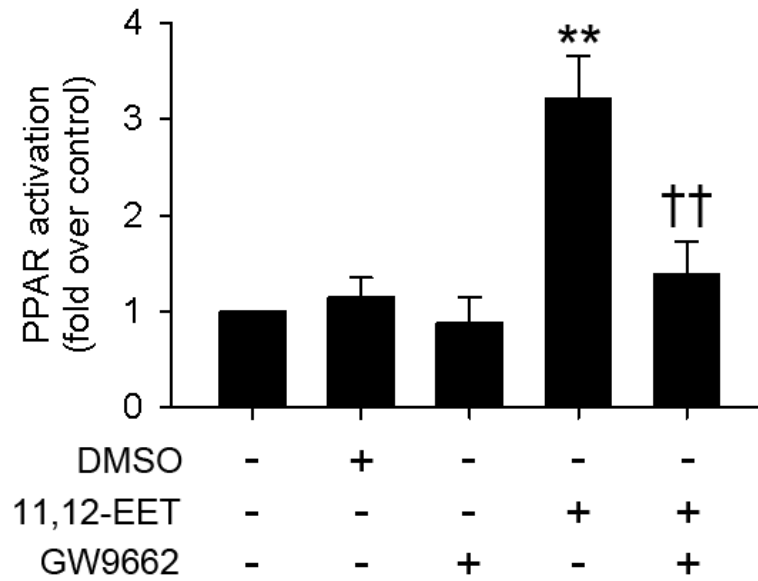

**Figure S6. 11,12-EET synergized with PPAR $\gamma$  transection to induce PPAR reporter gene activation in HEK293 cells.** HEK293 cells were transfected with pcDNA-PPAR $\gamma$ . 11,12-EET markedly induced PPAR reporter gene activation, while PPAR $\gamma$  antagonist GW9662 (1  $\mu$ mol/l) significantly abolished this effect (n=3 for each experiment; \*\*  $P<0.01$  vs. control; ††  $P<0.01$  vs. 11,12-EET).

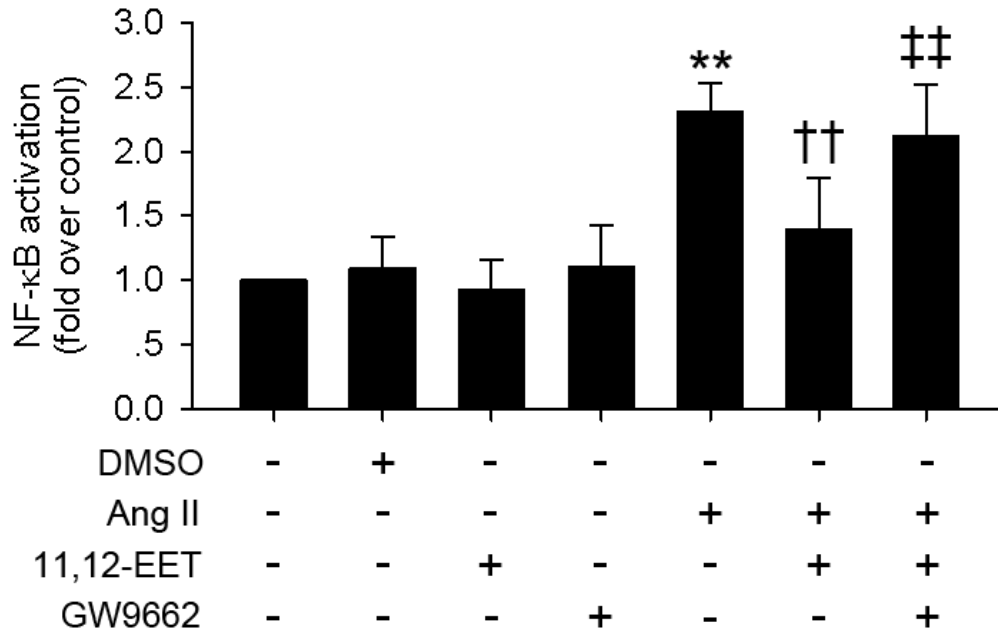

**Figure S7. The protective effect of 11,12-EET on NF-κB activation is mediated by PPAR $\gamma$  in HEK293 cells.** 11,12-EET (100 nmol/l) incubation markedly reduced Ang II (10  $\mu$ mol/l) induced NF-κB reporter gene activation, while PPAR $\gamma$  antagonist GW9662 (1  $\mu$ mol/l) markedly inhibited this effect (n=3 for each experiment, \*\*  $P<0.01$  vs. control; ††  $P<0.01$  vs. Ang II; ‡‡  $P<0.01$  vs. Ang II + 11,12-EET).



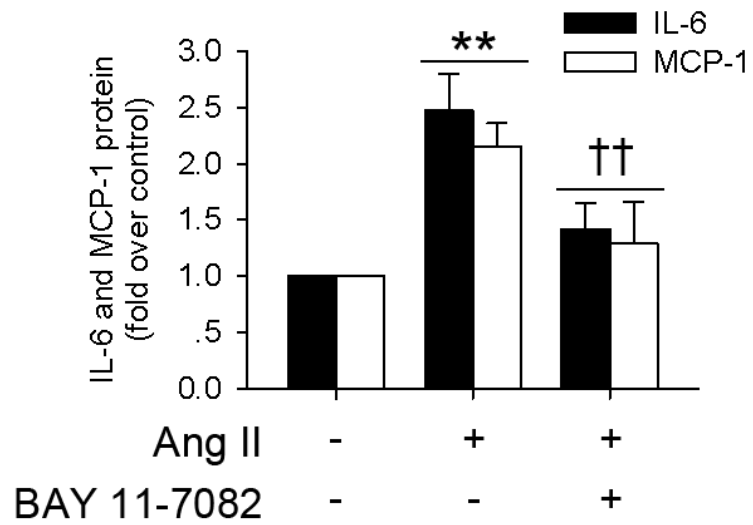

**Figure S8. NF- $\kappa$ B signaling mediates Ang II induced inflammatory cytokines expression in VSMCs.** ELISA analysis showed that NF- $\kappa$ B inhibitor BAY 11-7082 (10  $\mu$ mol/l) significantly blocked the increase in IL-6 and MCP-1 expression stimulated by Ang II (10  $\mu$ mol/l) incubation in VSMCs (n=3 for each experiment; \*\*  $P$ <0.01 vs. control; ††  $P$ <0.01 vs. Ang II).
